# Supplementary figures and images for: The Iroquois homeobox proteins IRX3 and IRX5 have distinct roles in Wilms tumour development and human nephrogenesis
Source: PubMed Central journal article supplement — J Pathol. 2018 Nov 29;247(1):86–98. doi: 10.1002/path.5171 (PMC6588170; doi:10.1002/path.5171), 2018-11-29

Figure S1.

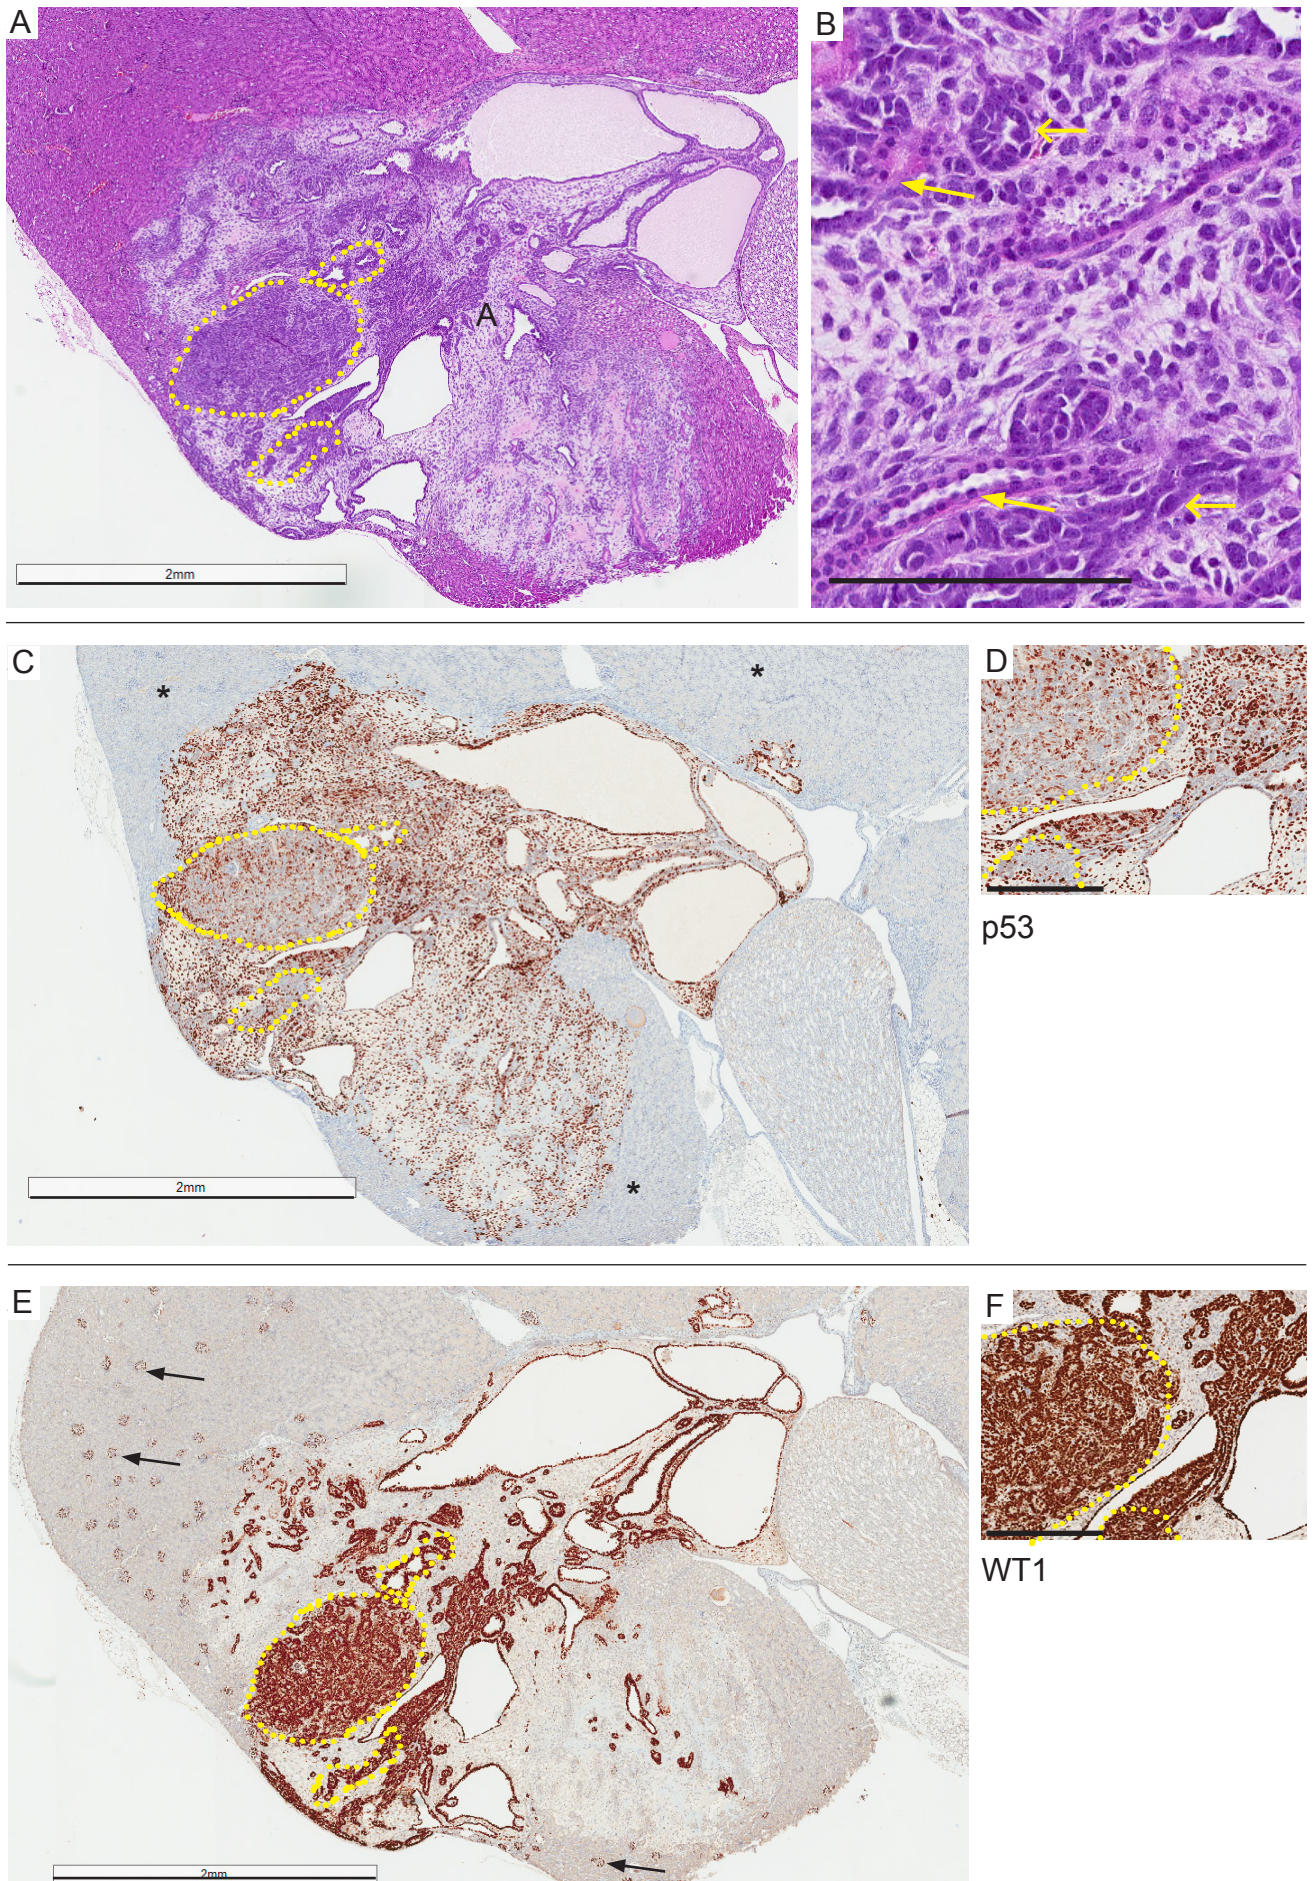

Supplement: PATH-247-86-s003.pdf [file PATH-247-86-s003.pdf]

Figure S2.

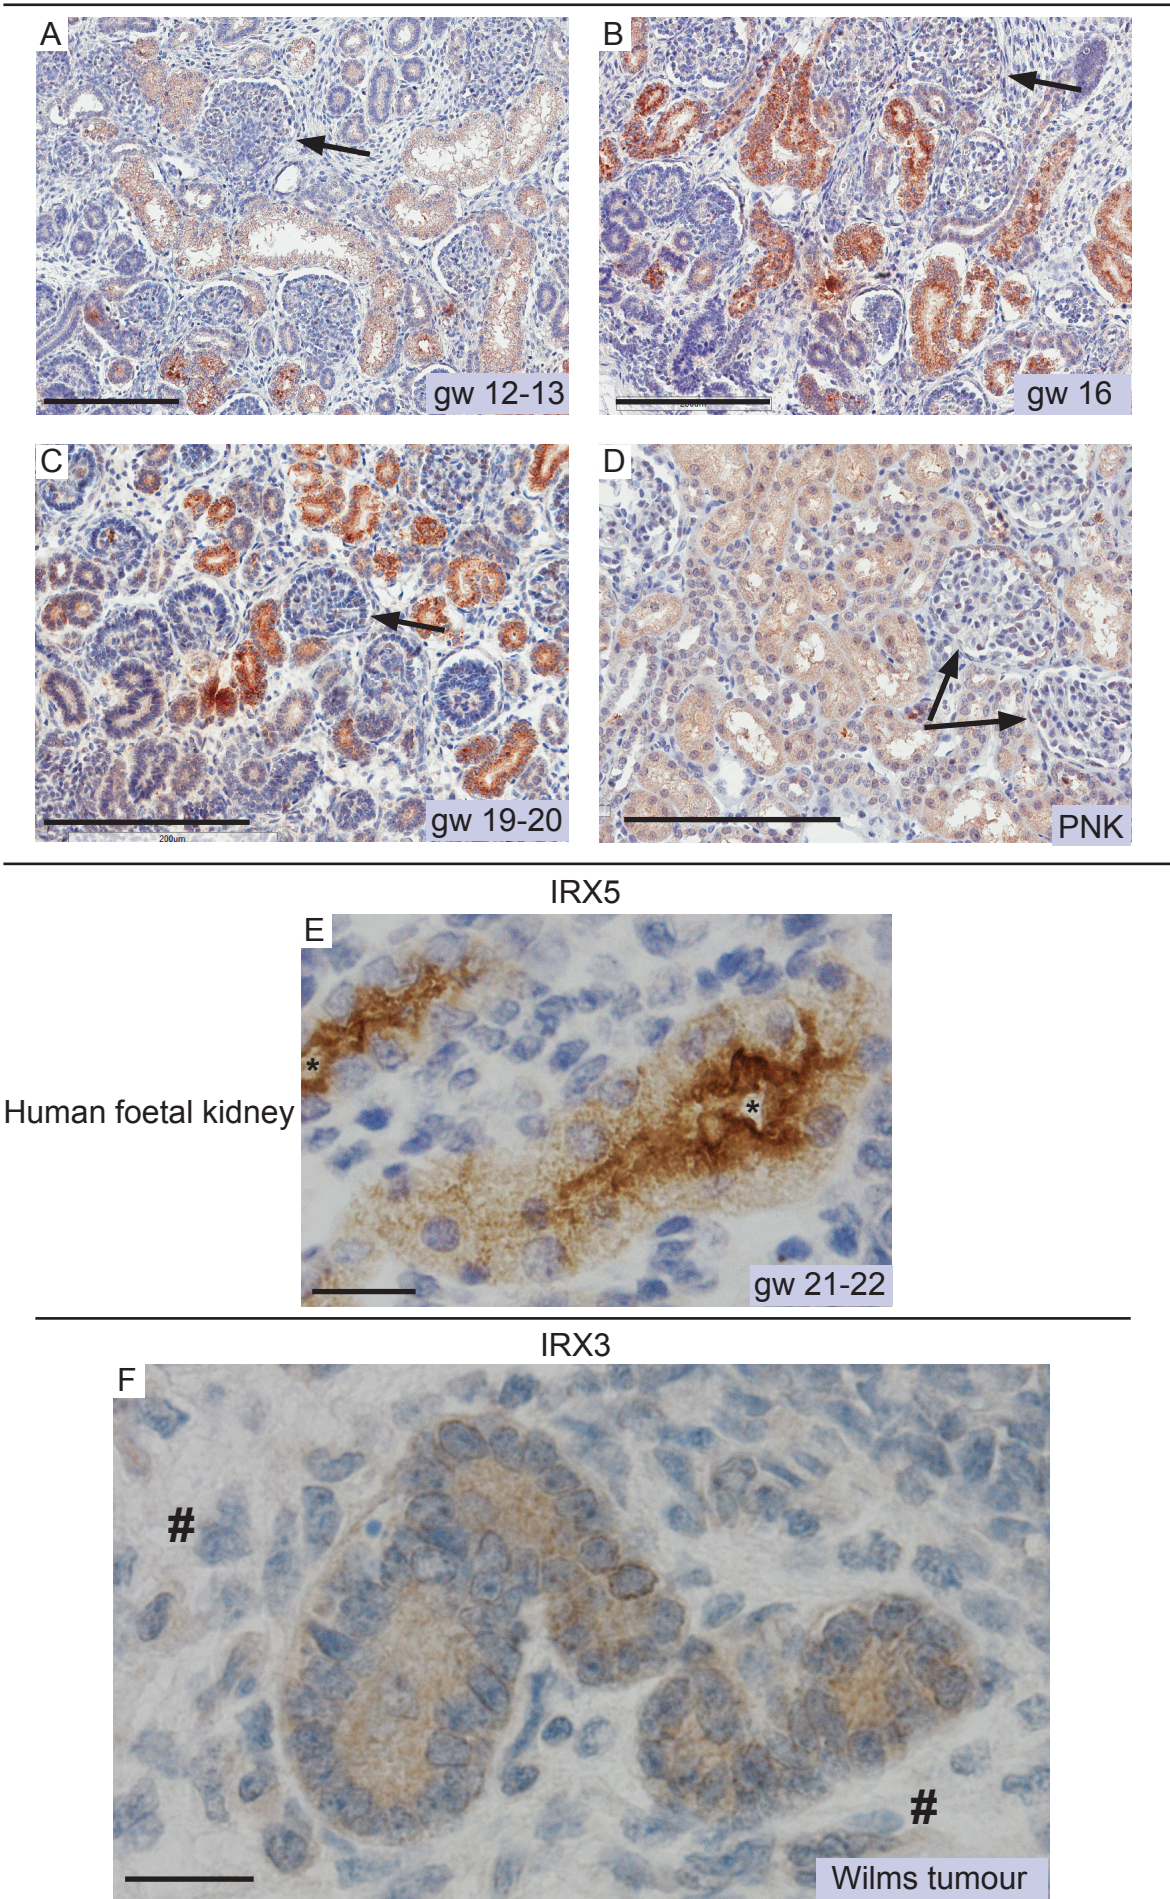

Supplement: PATH-247-86-s004.pdf [file PATH-247-86-s004.pdf]

Figure S3.

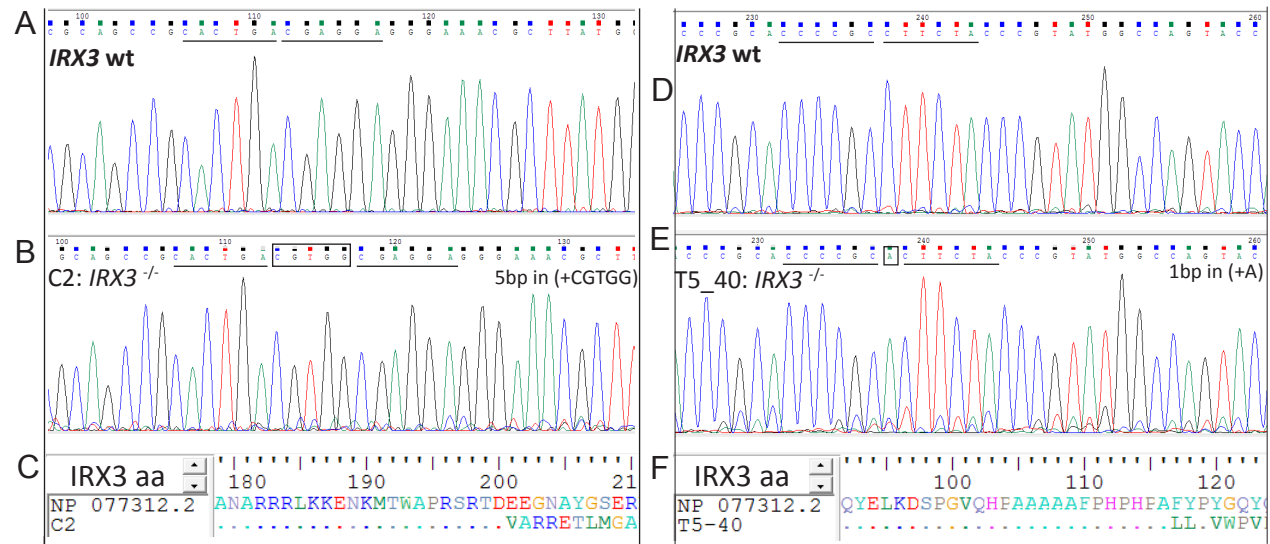

*IRX5* knock out clones based on WiT49 cells

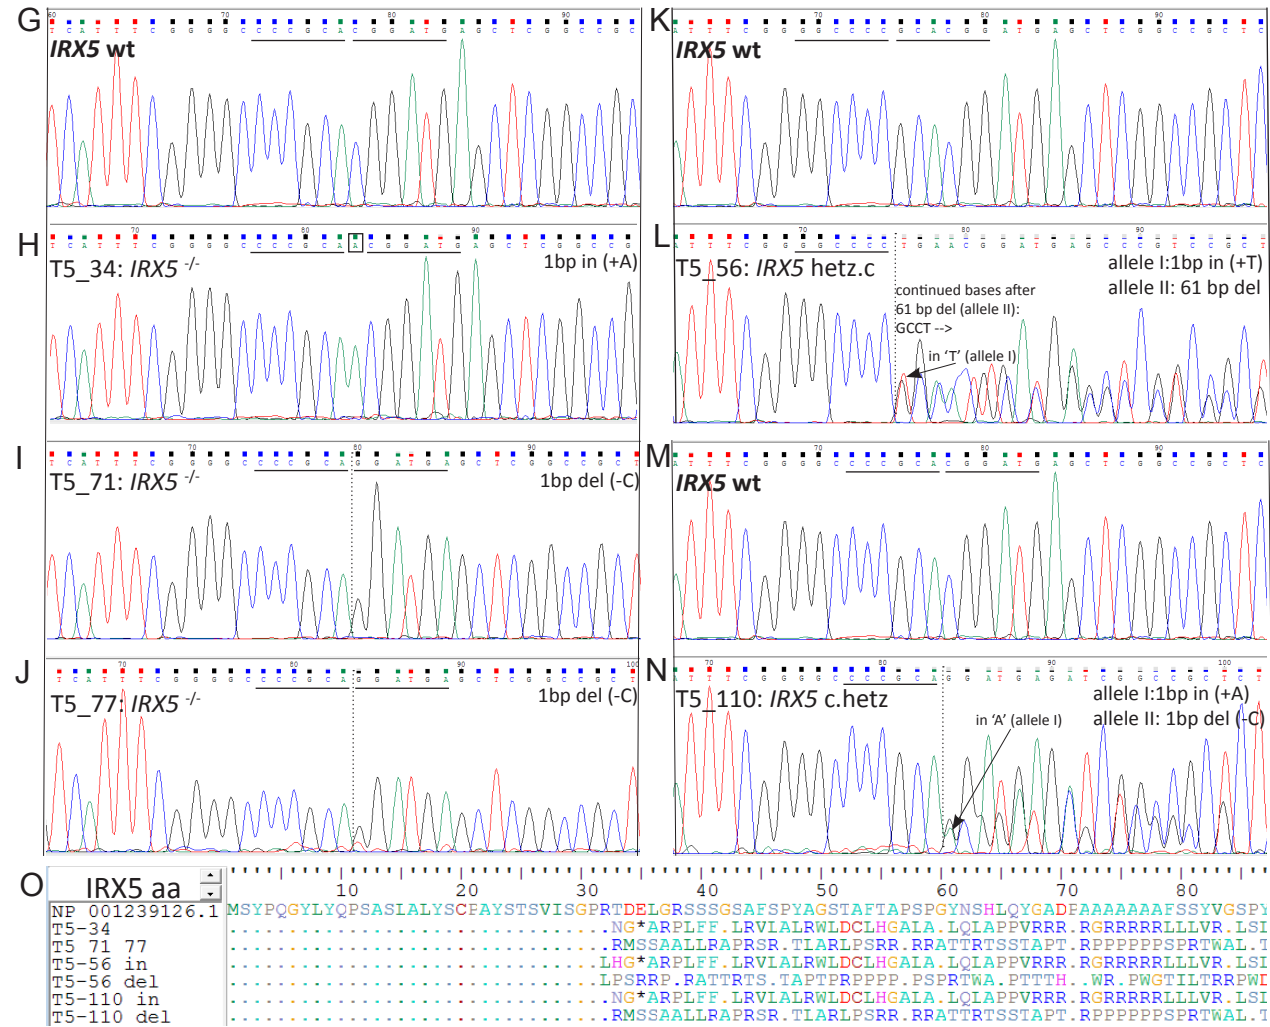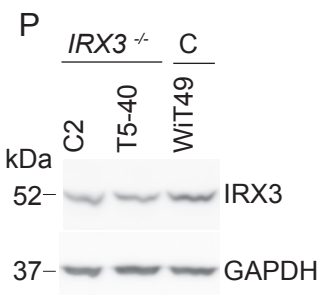

Supplement: PATH-247-86-s005.pdf [file PATH-247-86-s005.pdf]

Figure S4.

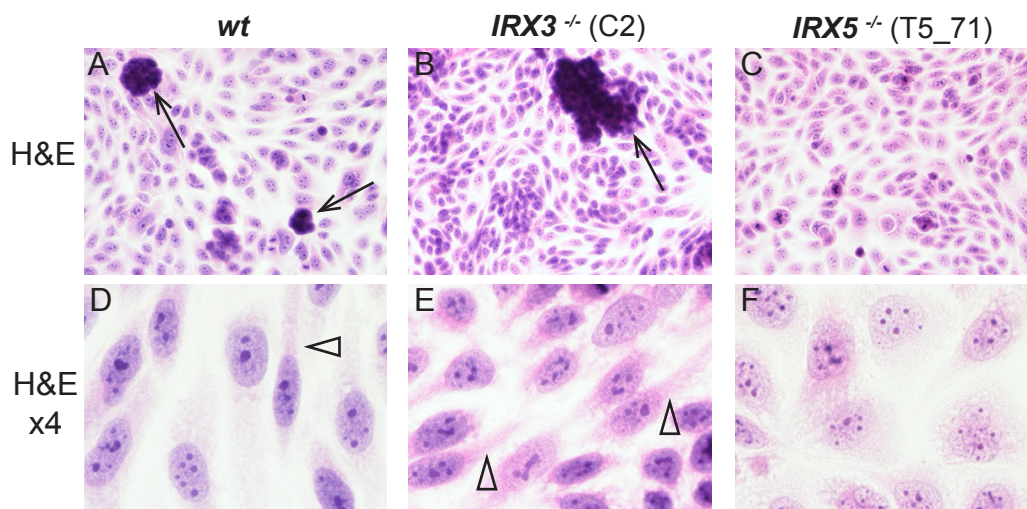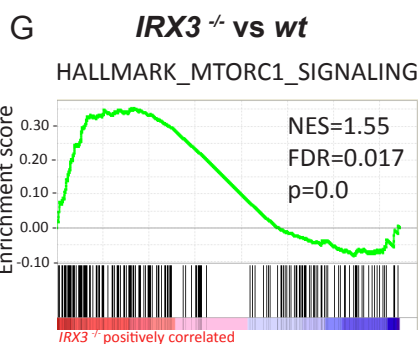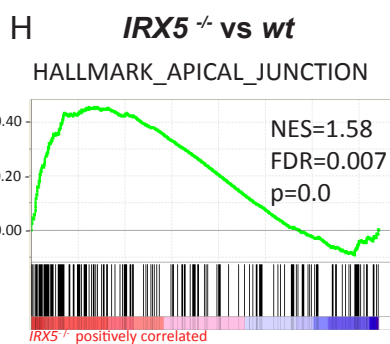

C5\_biological pathways summary

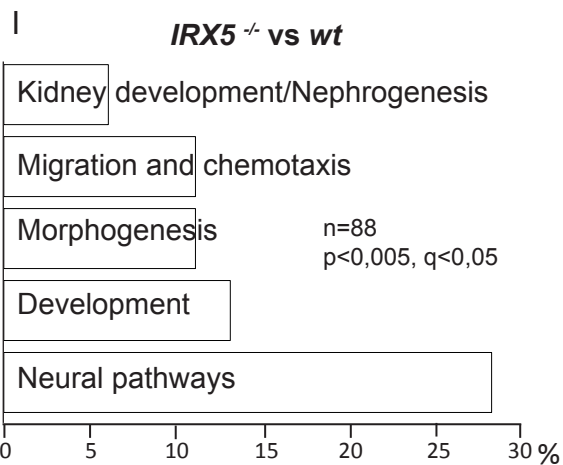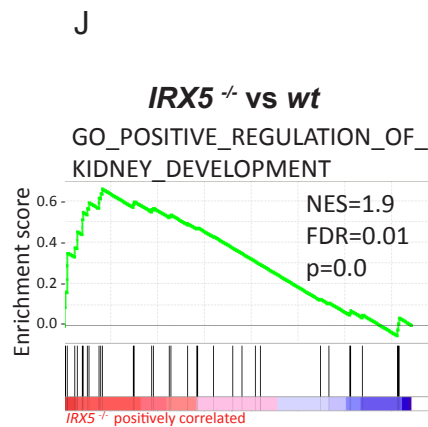

Supplement: PATH-247-86-s006.pdf [file PATH-247-86-s006.pdf]

Figure S5.

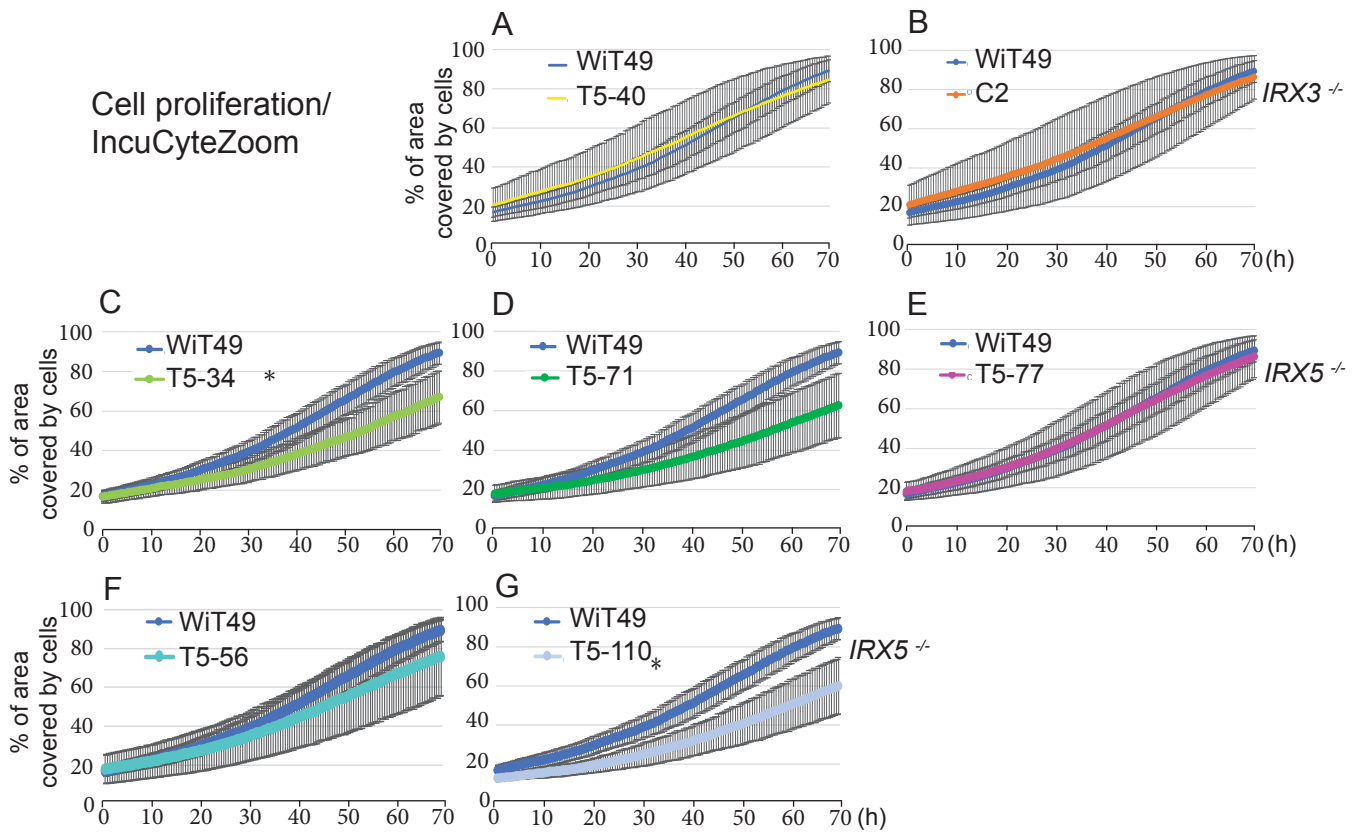

Cell proliferation/ MTS assay

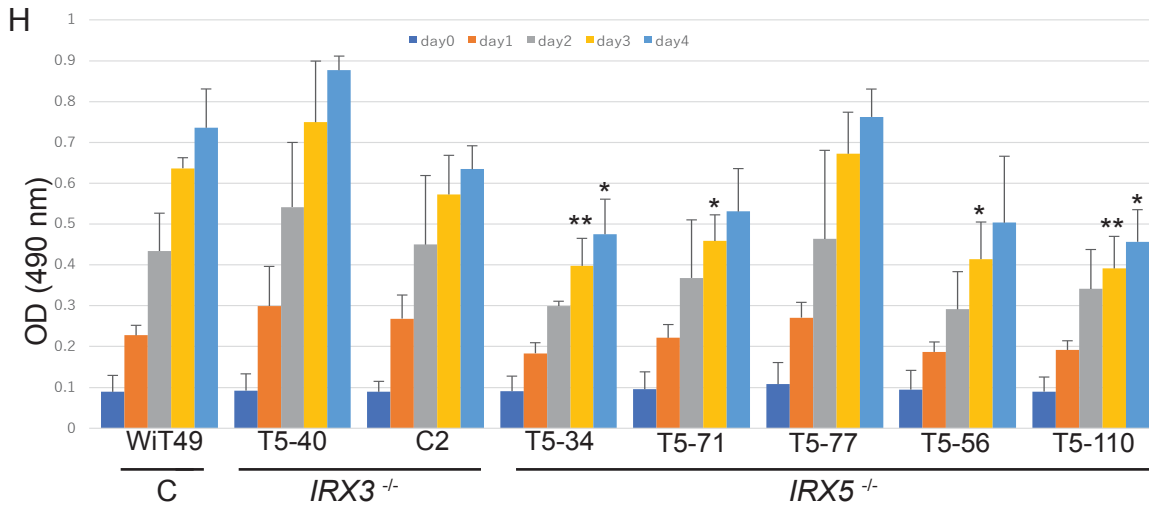

Supplement: PATH-247-86-s007.pdf [file PATH-247-86-s007.pdf]

Figure S6.

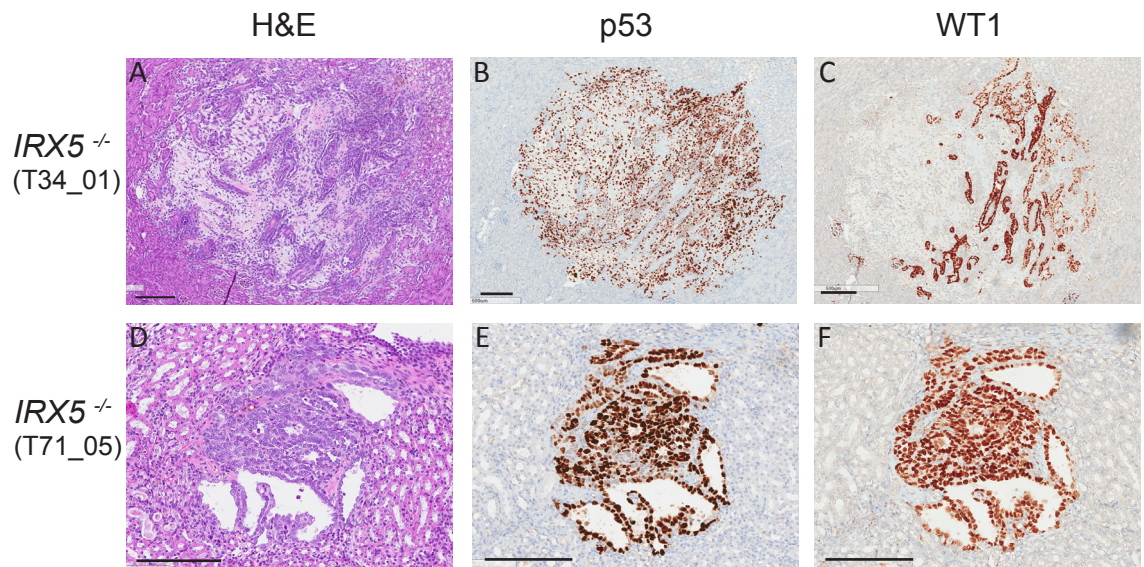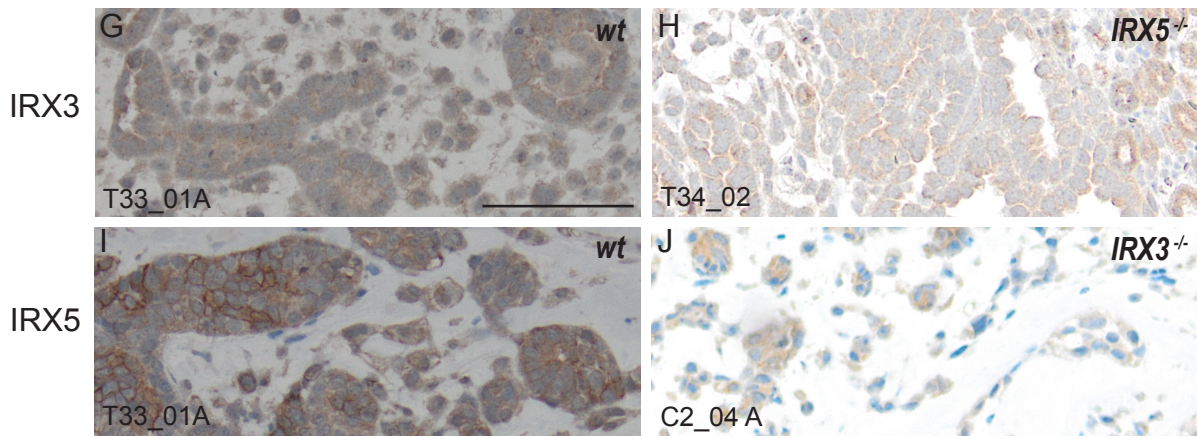

Supplement: PATH-247-86-s008.pdf [file PATH-247-86-s008.pdf]

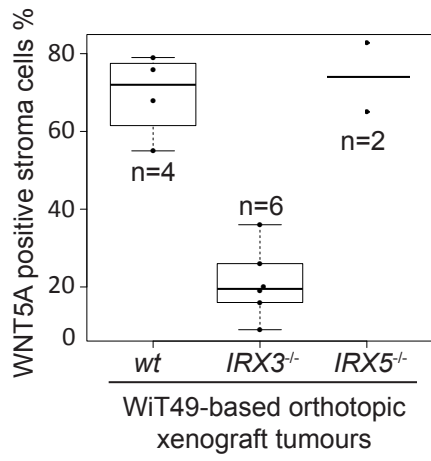

Figure S7.

Supplement: PATH-247-86-s009.pdf [file PATH-247-86-s009.pdf]

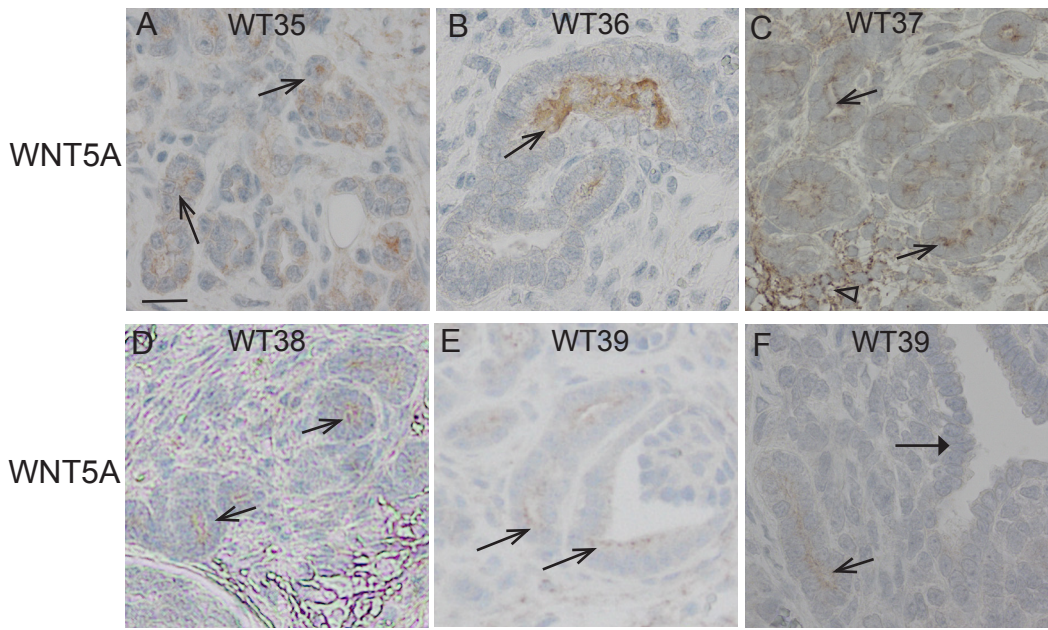

Figure S8.

Supplement: PATH-247-86-s010.pdf [file PATH-247-86-s010.pdf]
